# Supplementary material for: Enhancement of photosynthetic capacity in Euglena gracilis by expression of cyanobacterial fructose-1,6-/sedoheptulose-1,7-bisphosphatase leads to increases in biomass and wax ester production
Source: PubMed Central journal article supplement (PMC4459067; doi:10.1186/s13068-015-0264-5), 2015-05-30
Supplement: 13068_2015_264_MOESM2_ESM.pdf [file 13068_2015_264_MOESM2_ESM.pdf]

**Table S2** Biomass production of wild-type and *EpFS4* cells grown under normal conditions

| genotypes    | mg of D.W. l <sup>-1</sup> |
|--------------|----------------------------|
| wild type    | 457.8±78.5                 |
| <i>EpFS4</i> | 516.4±67.2                 |

Values are the mean ± standard deviation of the analysis of 5-8 independent cultures.
