# Supplementary material for: Enhancement of photosynthetic capacity in Euglena gracilis by expression of cyanobacterial fructose-1,6-/sedoheptulose-1,7-bisphosphatase leads to increases in biomass and wax ester production
Source: PubMed Central journal article supplement (PMC4459067; doi:10.1186/s13068-015-0264-5), 2015-05-30
Supplement: 13068_2015_264_MOESM3_ESM.pdf [file 13068_2015_264_MOESM3_ESM.pdf]

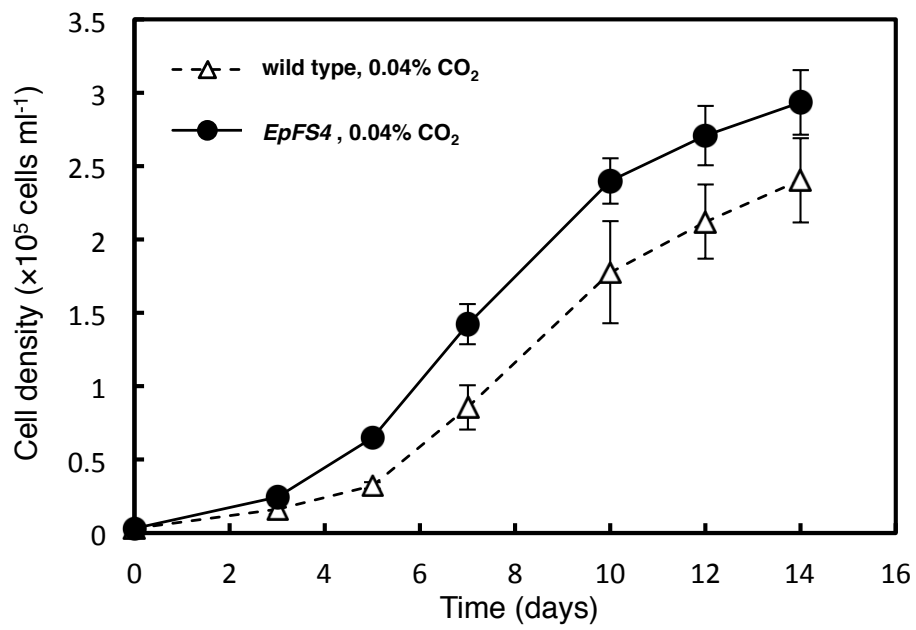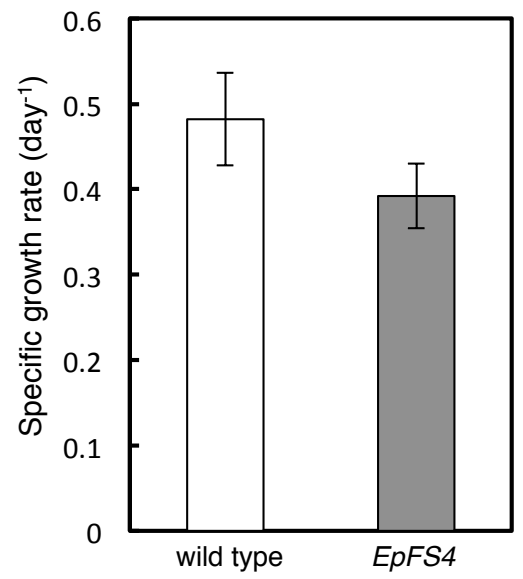

**Figure S1**
