# Supplementary material for: Enhancement of photosynthetic capacity in Euglena gracilis by expression of cyanobacterial fructose-1,6-/sedoheptulose-1,7-bisphosphatase leads to increases in biomass and wax ester production
Source: PubMed Central journal article supplement (PMC4459067; doi:10.1186/s13068-015-0264-5), 2015-05-30
Supplement: 13068_2015_264_MOESM4_ESM.pdf [file 13068_2015_264_MOESM4_ESM.pdf]

**Table S3** Wax ester (C28) content in wild-type and *EpFS4* cells grown under normal conditions after anaerobic incubation

| Genotypes    | ng 10 <sup>-5</sup> cells | ng mg <sup>-1</sup> DW |
|--------------|---------------------------|------------------------|
| wild type    | 0.46±0.17                 | 6.3±2.8                |
| <i>EpFS4</i> | 0.49±0.23                 | 6.3±2.9                |

Values are the mean ± standard deviation of the analysis of 3-5 independent cultures.
