# Supplementary material for: Enhancement of photosynthetic capacity in Euglena gracilis by expression of cyanobacterial fructose-1,6-/sedoheptulose-1,7-bisphosphatase leads to increases in biomass and wax ester production
Source: PubMed Central journal article supplement (PMC4459067; doi:10.1186/s13068-015-0264-5), 2015-05-30
Supplement: 13068_2015_264_MOESM5_ESM.pdf [file 13068_2015_264_MOESM5_ESM.pdf]

**Table S4** Fatty acid content in wild-type and *EpFS4* cells grown under normal conditions after anaerobic incubation

| Chain-length | wild type                   | <i>EpFS4</i> | wild type                | <i>EpFS4</i> |
|--------------|-----------------------------|--------------|--------------------------|--------------|
|              | (ng 10 <sup>-5</sup> cells) |              | (ng mg <sup>-1</sup> DW) |              |
| C12          | 11.3±0.5                    | 10.1±0.4     | 149.1±5.9                | 134.1±9.1    |
| C14          | 51.6±2.5                    | 51.6±6.9     | 693.5±31.7               | 703.5±63.8   |
| C15          | 15.7±1.8                    | 15.8±1.4     | 213.5±23.3               | 206.1±29.8   |
| C16          | 246.8±18.6                  | 217.5±9.8    | 3240.7±18.6              | 2966.5±189.1 |
| C18          | 21.1±0.6                    | 22.2±0.6     | 285.2±27.7               | 289.1±20.7   |

Values are the mean ± standard deviation of the analysis of 4-5 independent cultures.
